# Supplementary figures and images for: Magnetic resonance imaging radiomics signatures for predicting endocrine resistance in hormone receptor-positive non-metastatic breast cancer
Source: PubMed Central journal article supplement — Breast. 2021 Sep 11;60:90–7. doi: 10.1016/j.breast.2021.09.005 (PMC8449264; doi:10.1016/j.breast.2021.09.005), 2021-09-11

A

rf.biop2

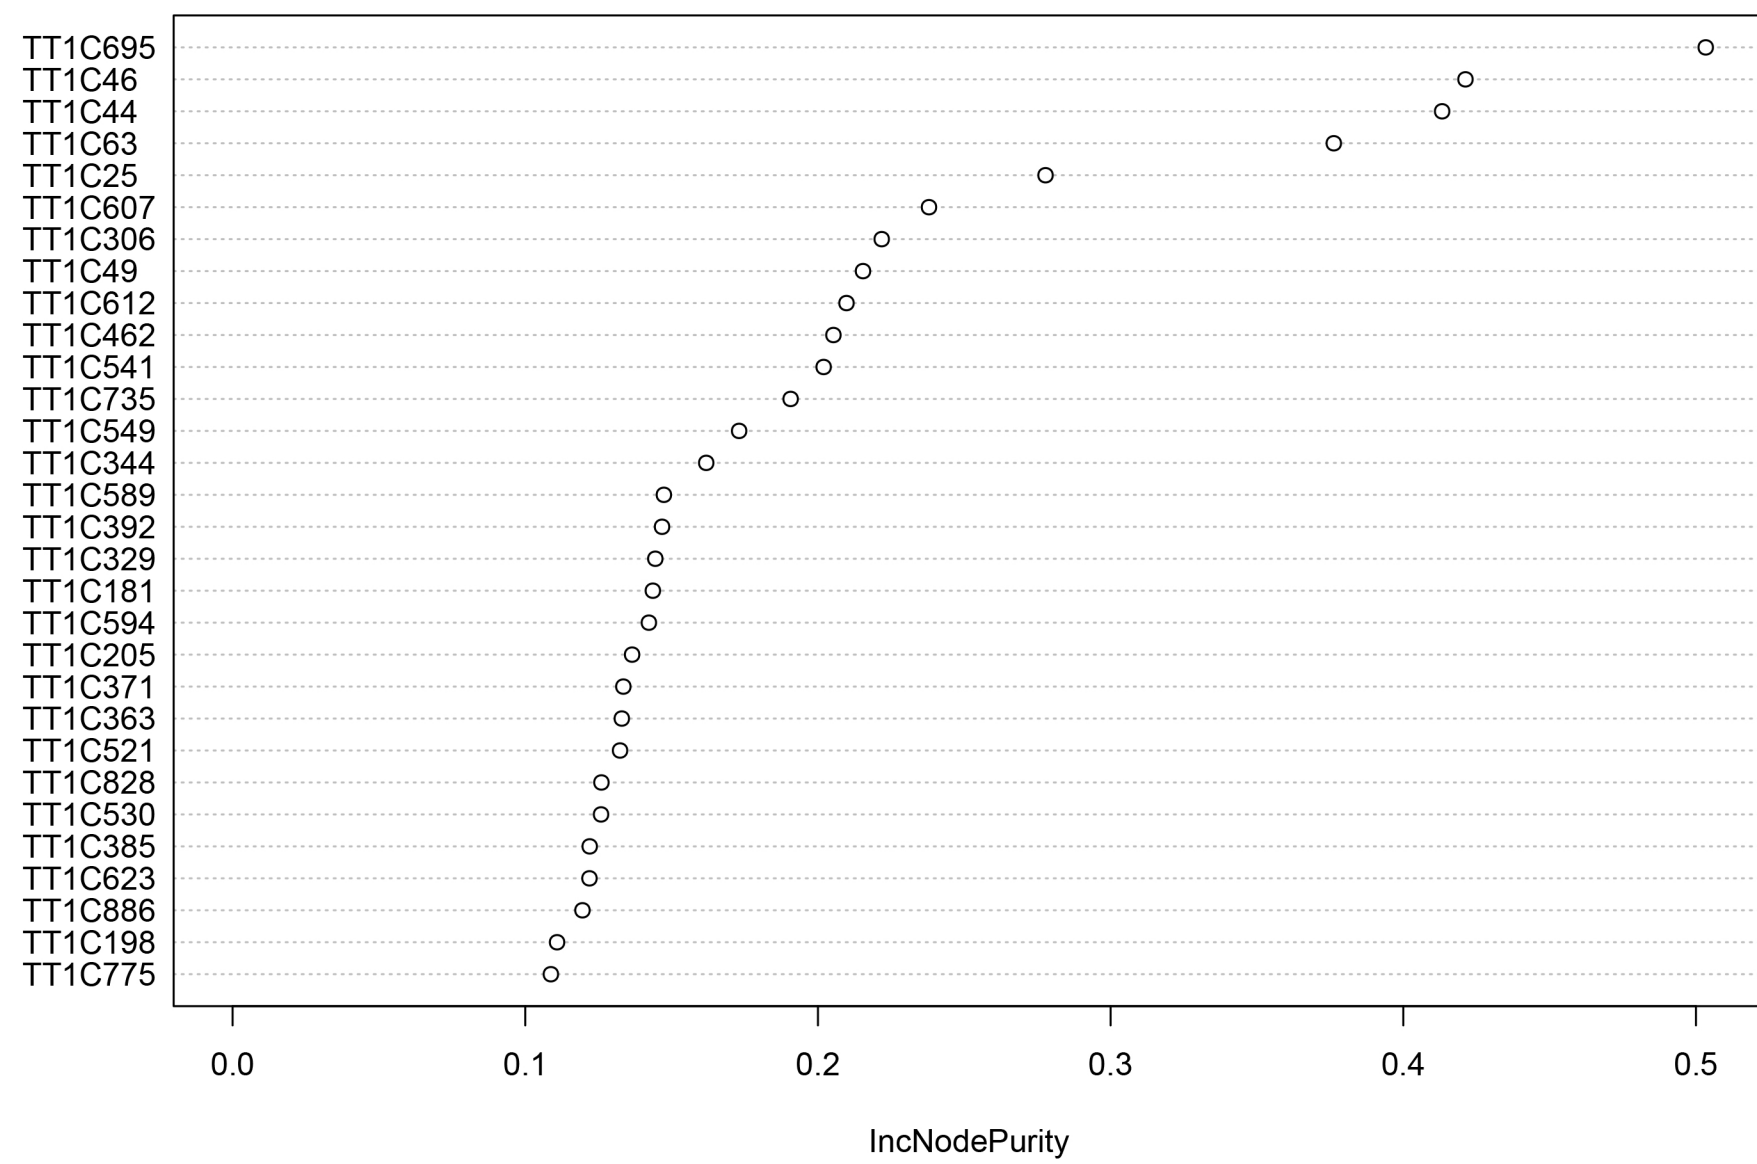

rf.biop

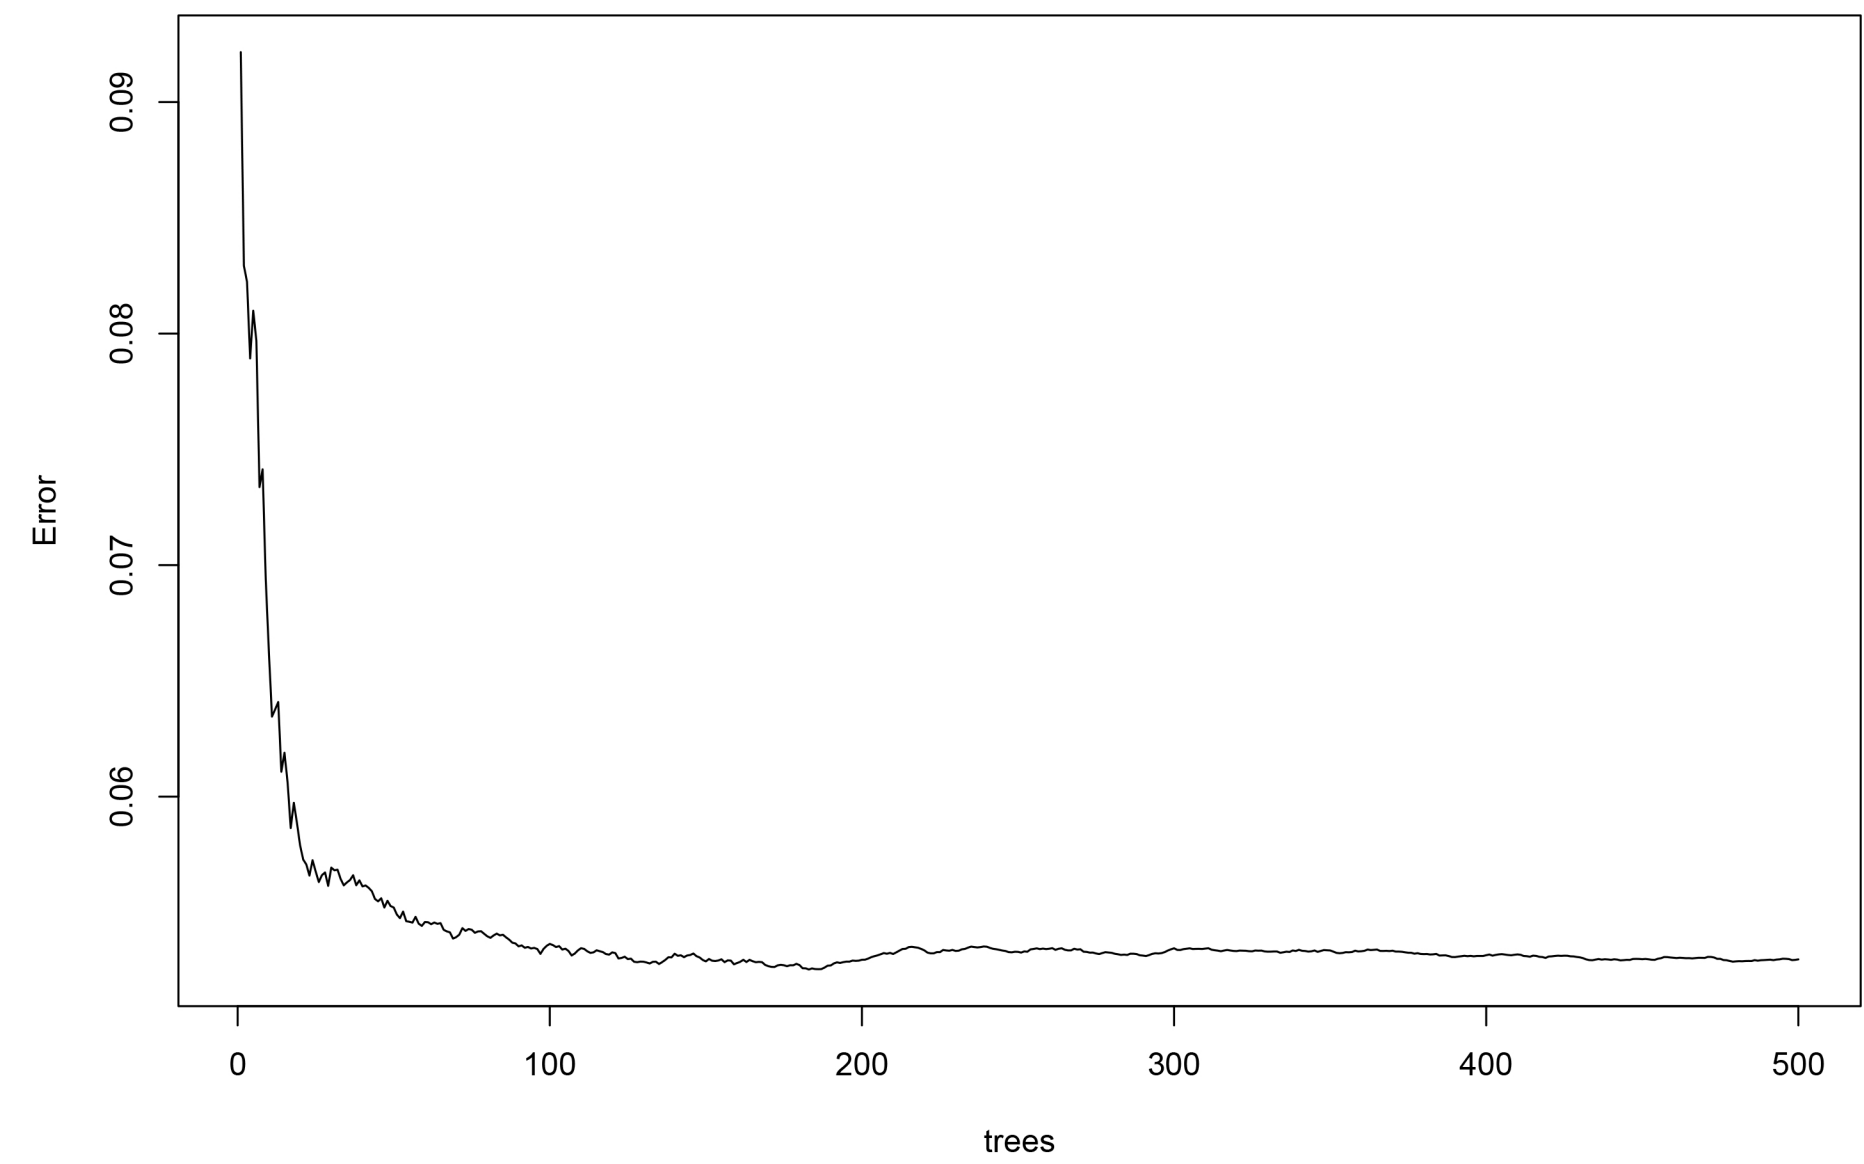

B

rf.biop2

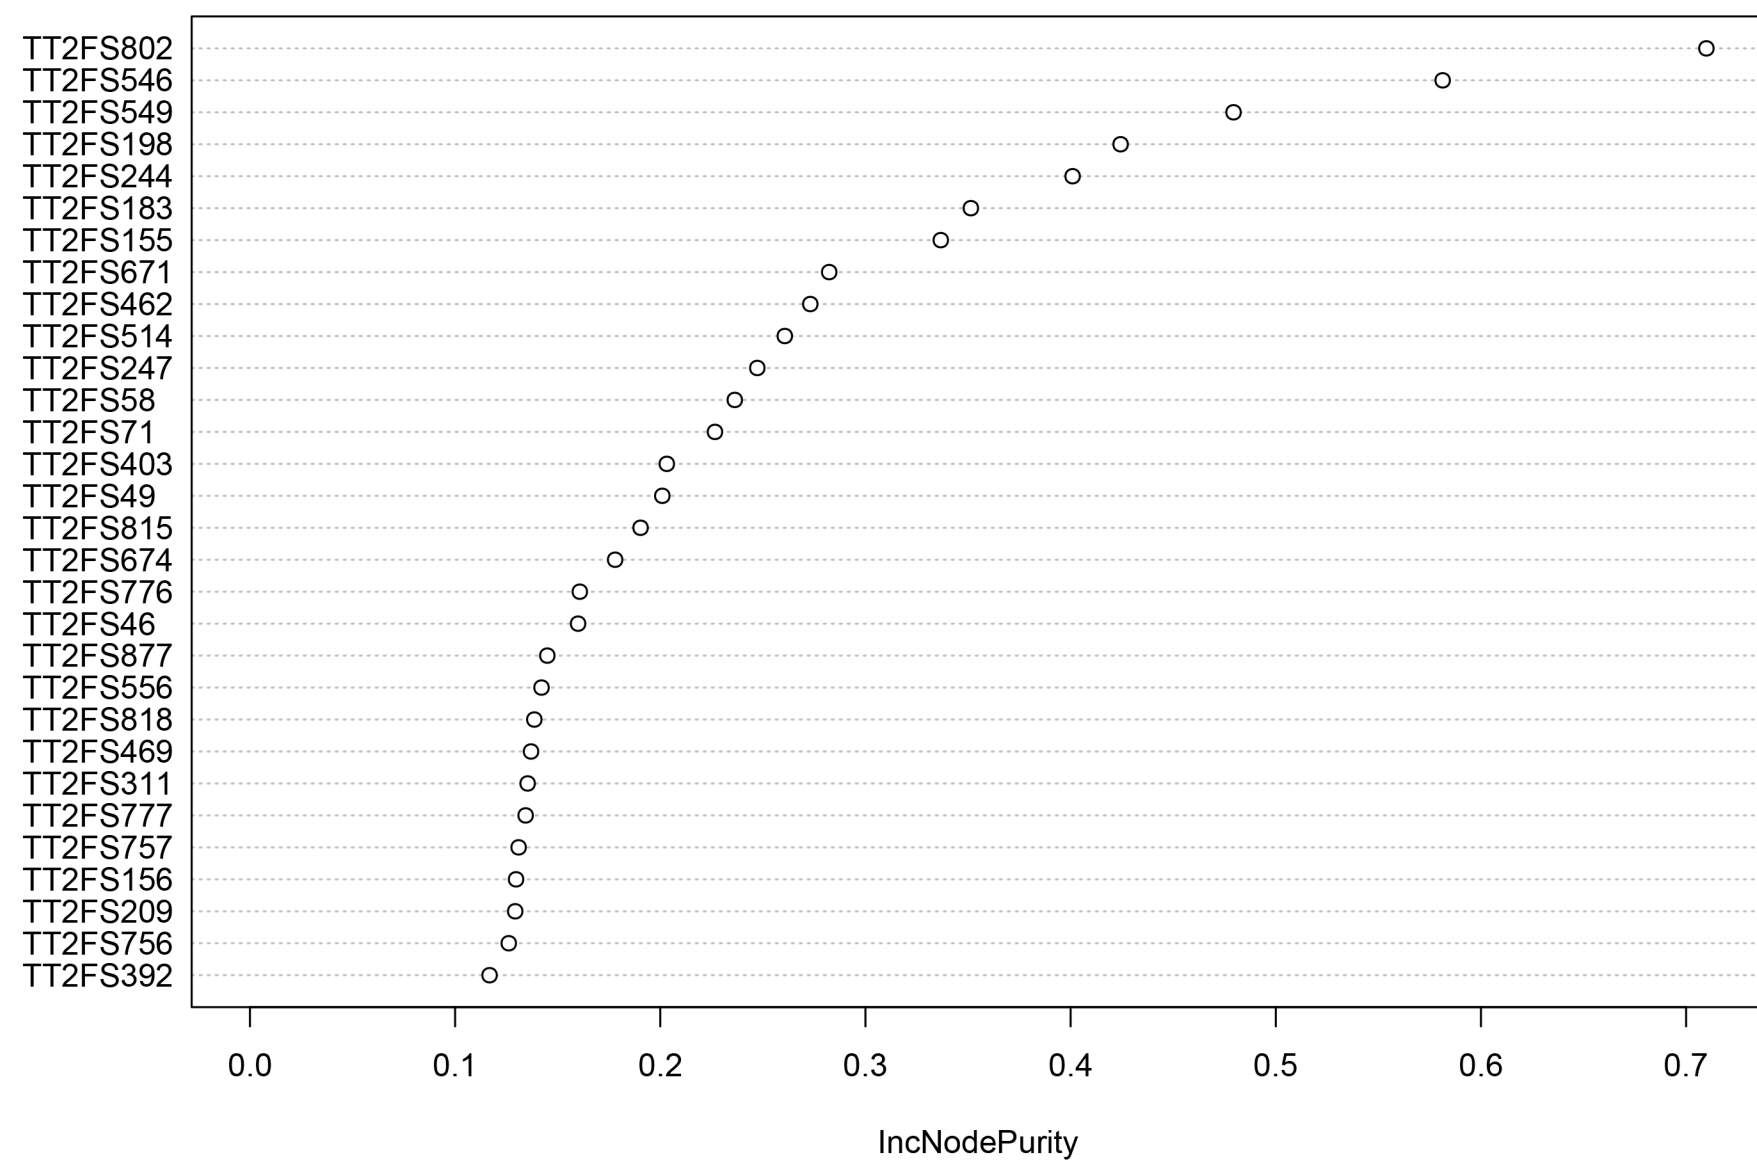

rf.biop

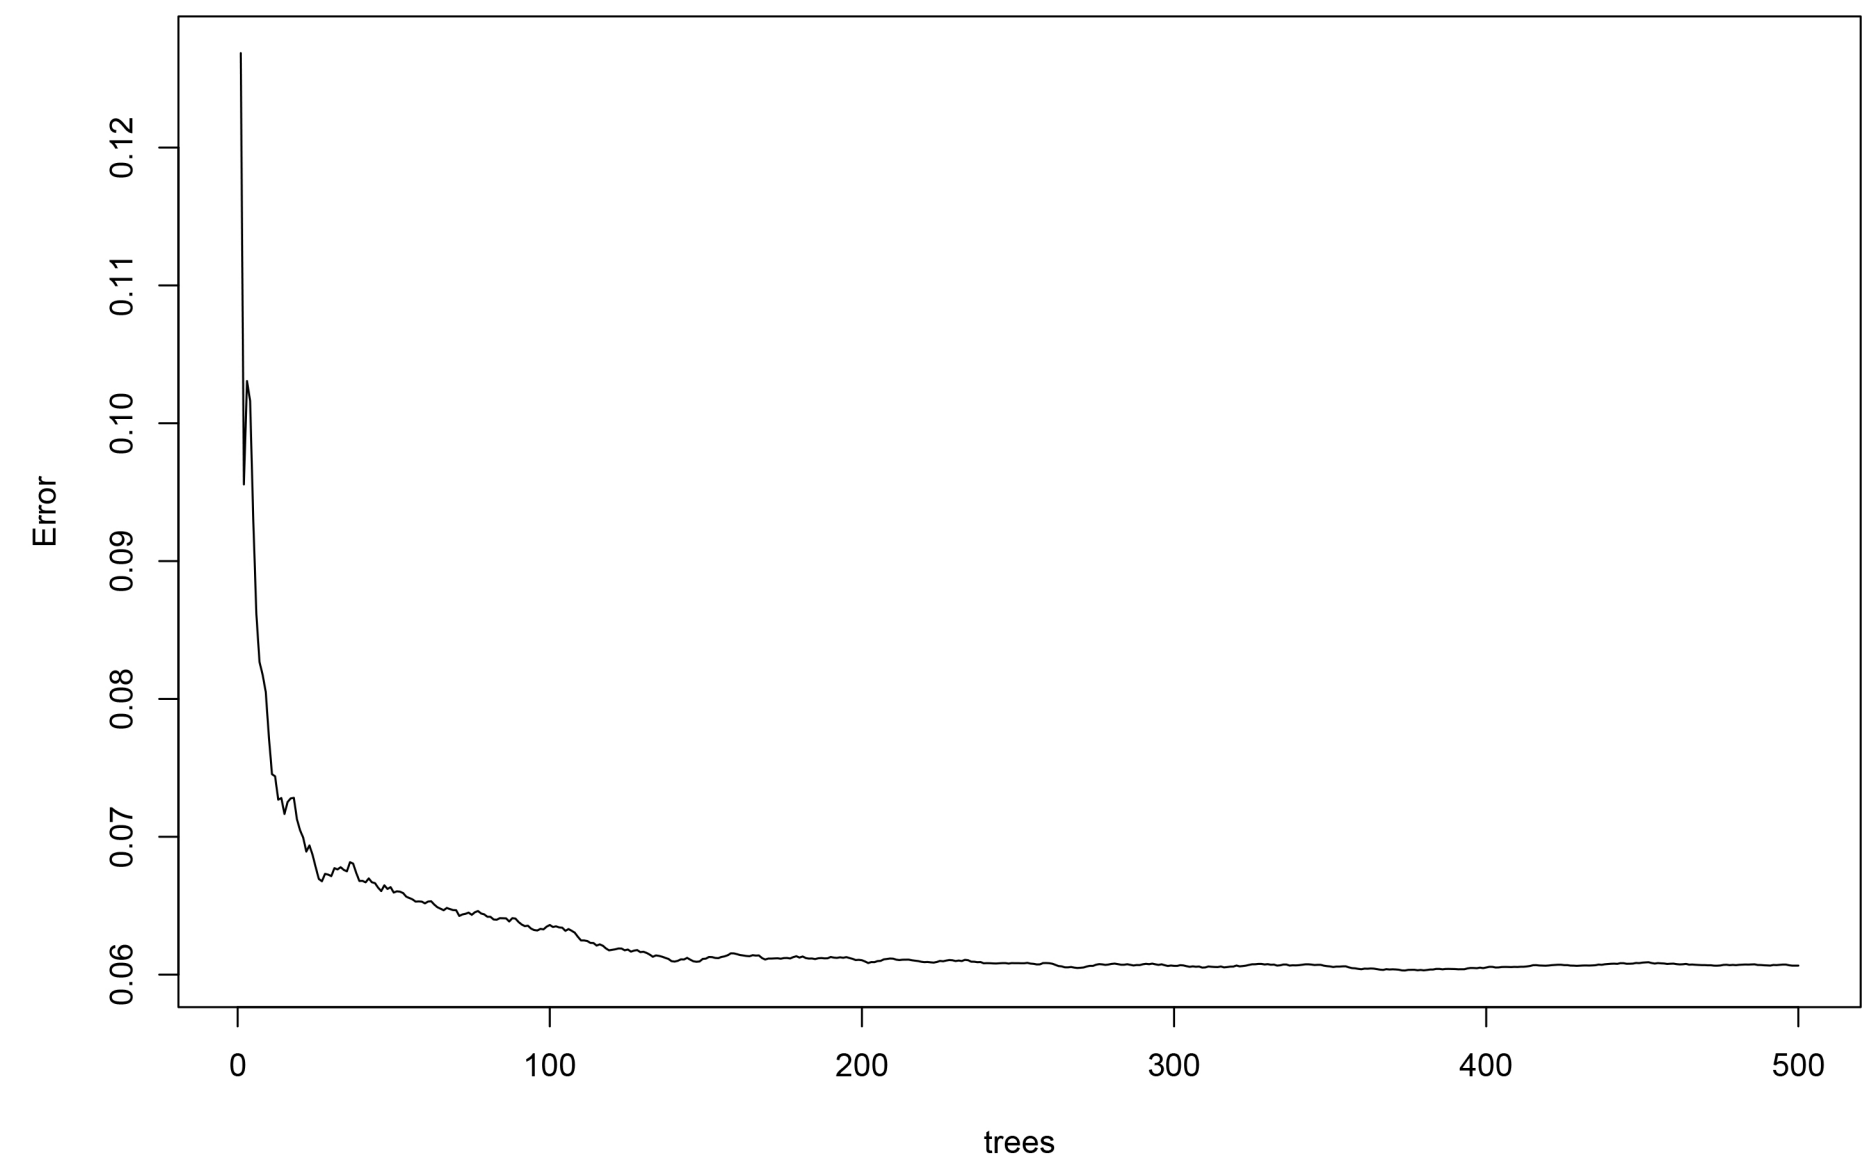

C

rf.biop2

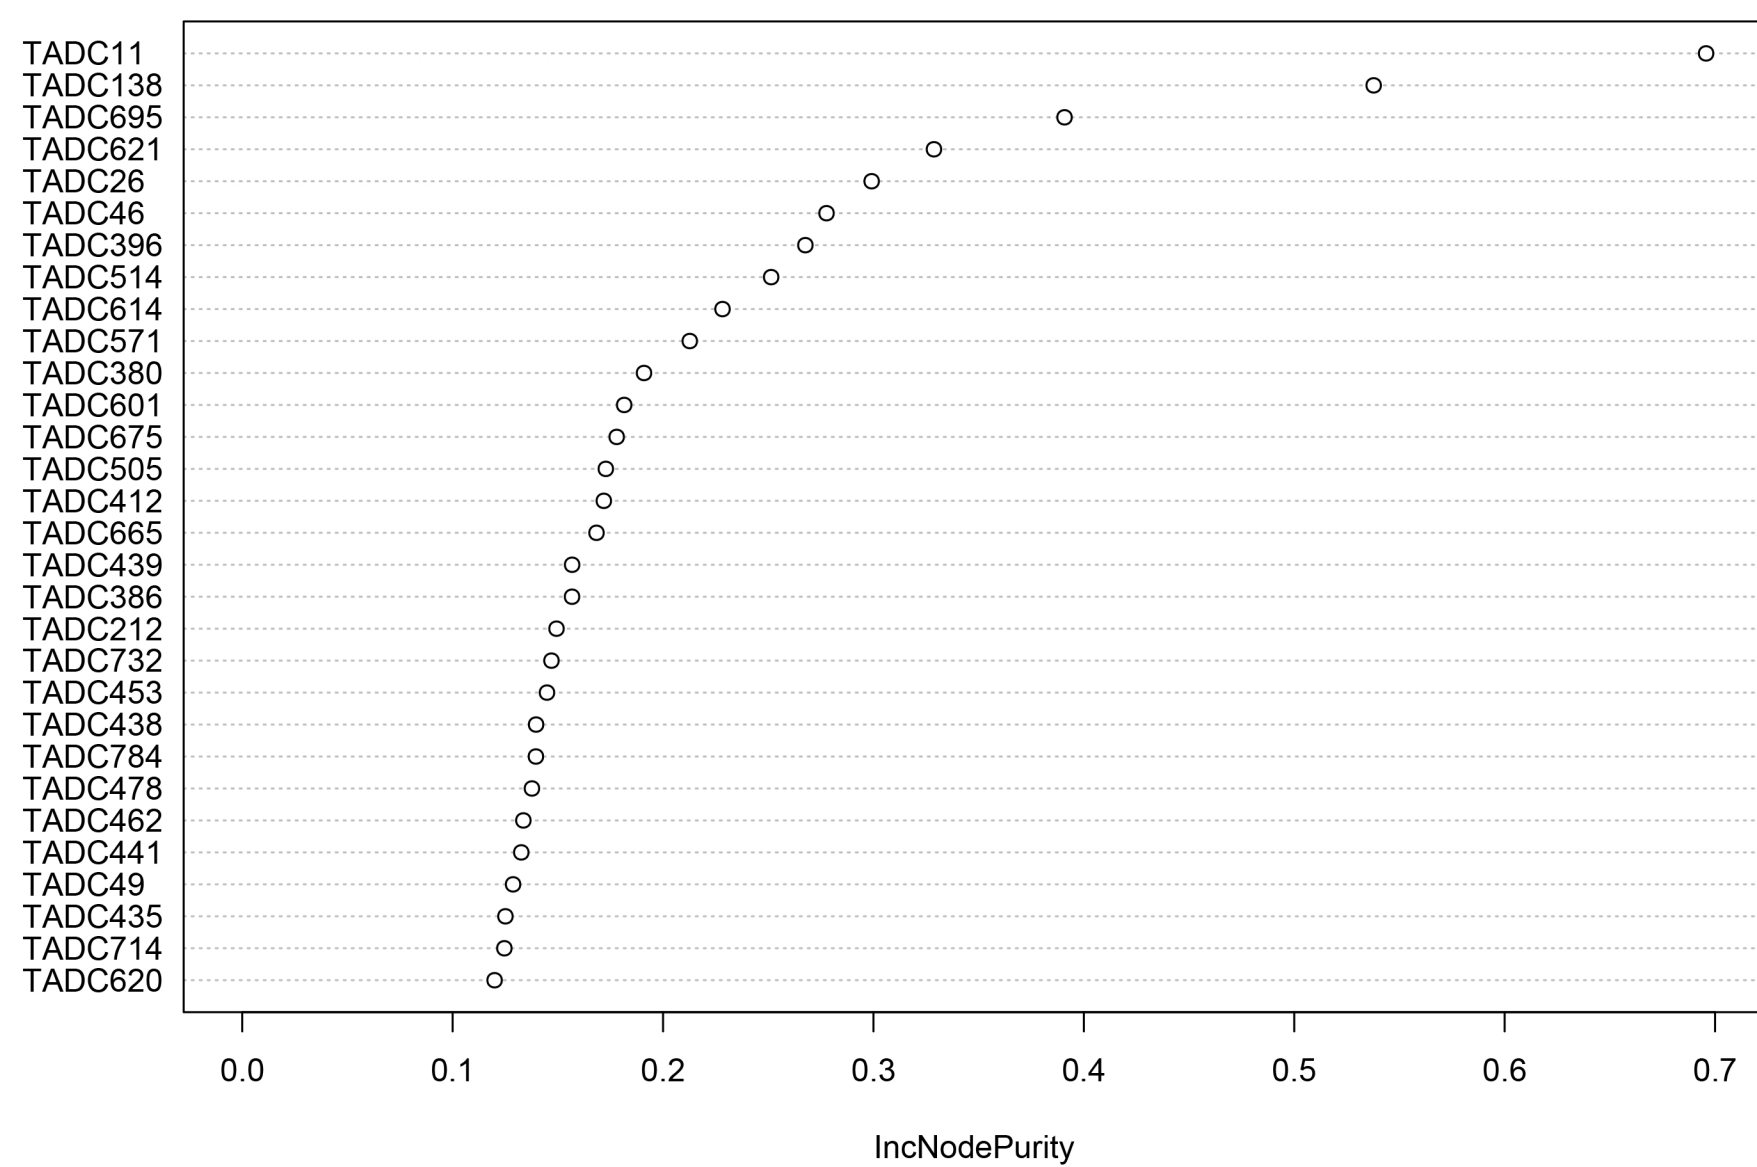

rf.biop

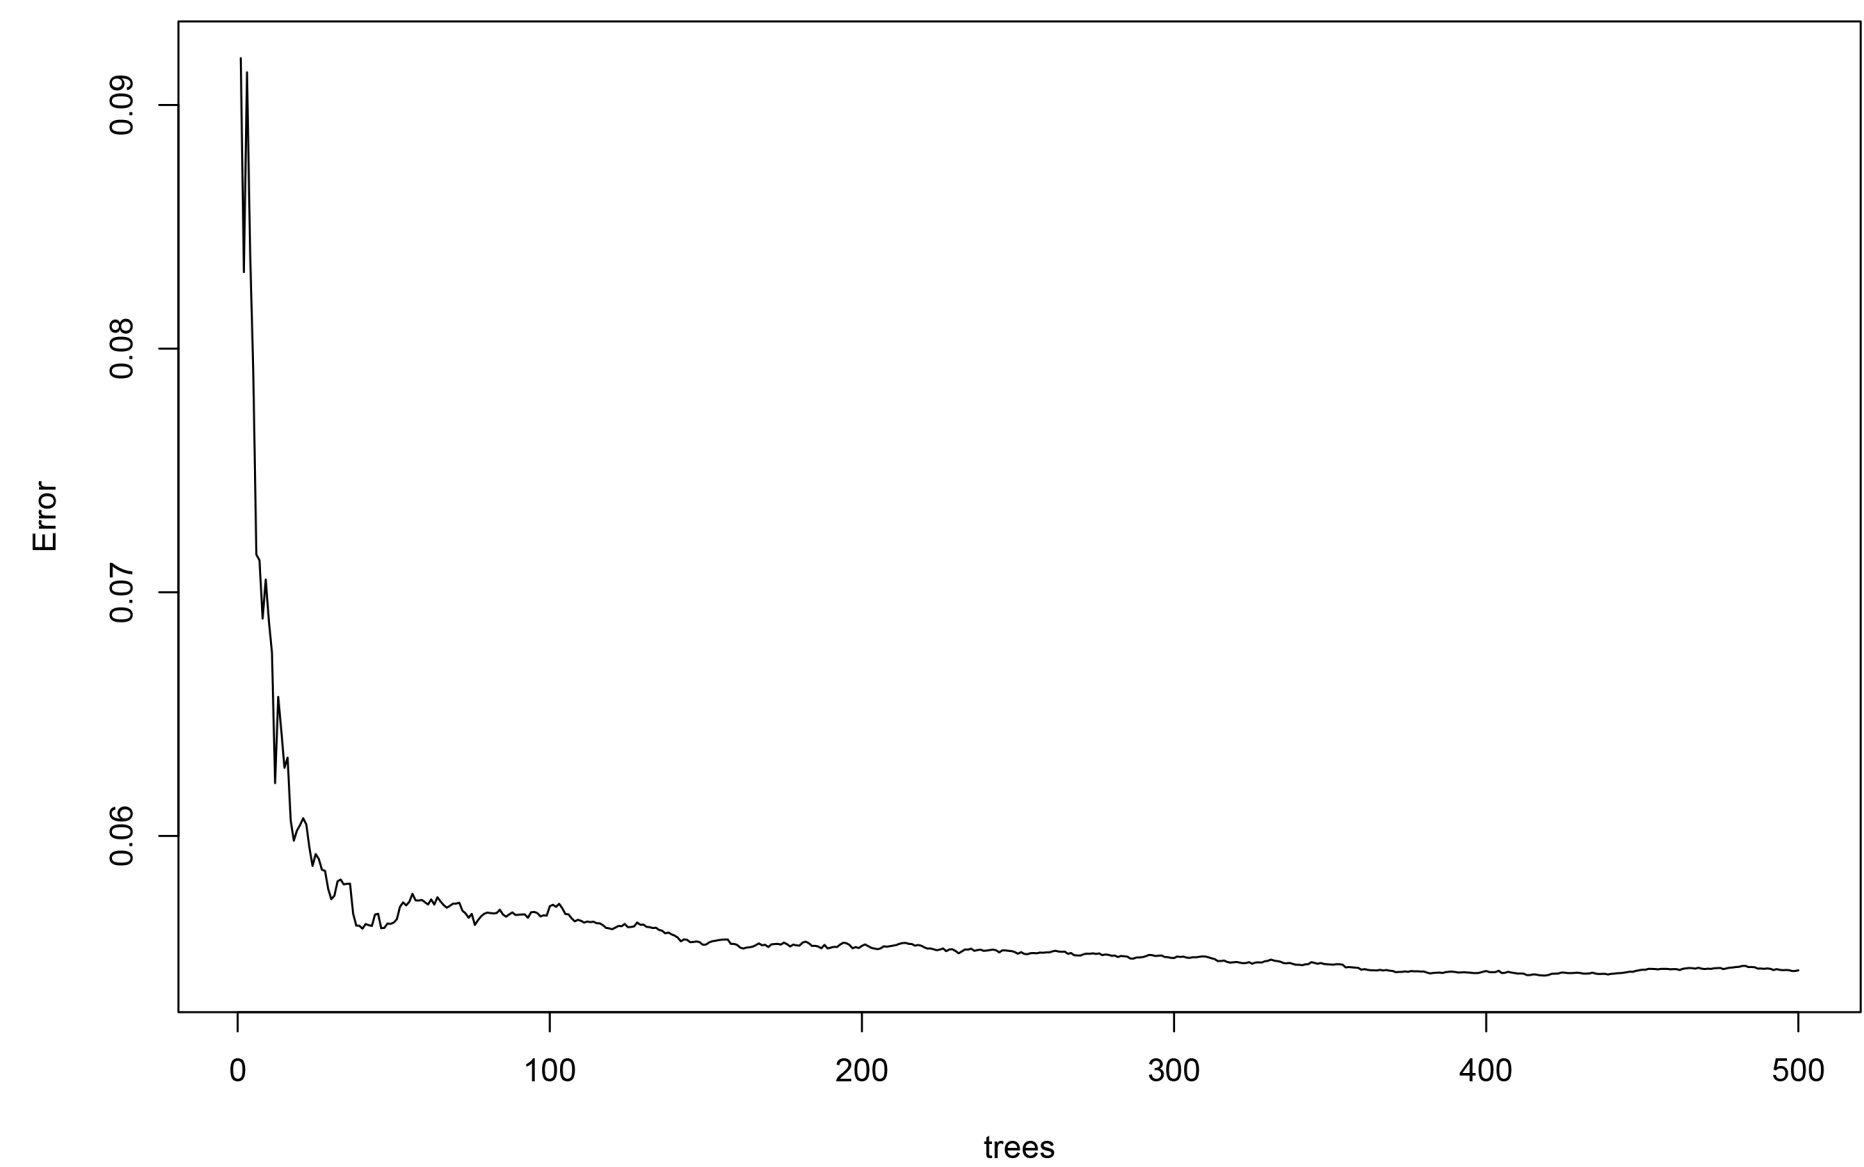

Supplement: mmc1.pdf [file mmc1.pdf]

Points

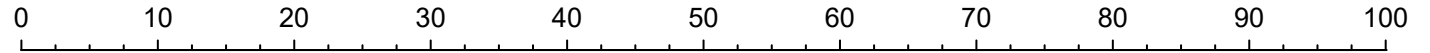

clinical1

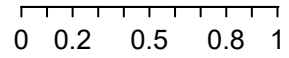

fit1

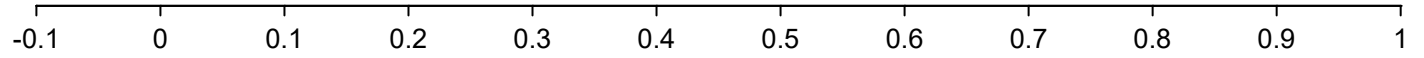

Total Points

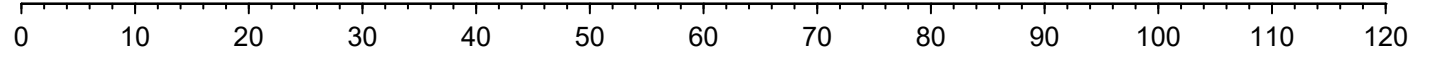

Linear Predictor

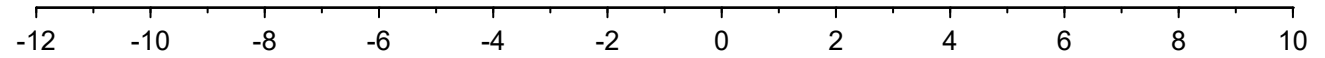

Endocrine resistance

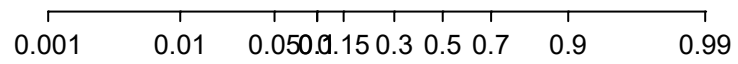

Supplement: mmc2.pdf [file mmc2.pdf]
